# Supplementary material for: Cognitive correlates of α4β2 nicotinic acetylcholine receptors in mild Alzheimer’s dementia
Source: PubMed Central journal article supplement — Brain. 2018 Apr 17;141(6):1840–54. doi: 10.1093/brain/awy099 (PMC5972585; doi:10.1093/brain/awy099), 2018-04-17
Supplement: awy099_brain-2017-02073-file005.pdf [file awy099_brain-2017-02073-file005.pdf]

## **Cognitive correlates of $\alpha 4\beta 2$ nicotinic acetylcholine receptors in mild Alzheimer's dementia**

Osama Sabri, MD PhD\*; Philipp M. Meyer, MD\*; Susanne Gräf, PhD; Swen Hesse, MD; Stephan Wilke, MD; Georg-Alexander Becker, PhD; Michael Rullmann, PhD; Marianne Patt, PhD; Julia Luthardt, PhD; Gudrun Wagenknecht, PhD; Alexander Hoepping, PhD; Rene Smits, PhD; Annegret Franke, PhD; Bernhard Sattler, PhD; Solveig Tiepolt, MD; Steffen Fischer, PhD; Winnie Deuther-Conrad, PhD; Ulrich Hegerl, MD; Henryk Barthel, MD PhD; Peter Schönknecht, MD\*; Peter Brust, PhD\*

\*These authors contributed equally.

**Authors Affiliations:** Department of Nuclear Medicine, University of Leipzig, Leipzig, Germany (Sabri, Meyer, Hesse, Wilke, Becker, Rullmann, Patt, Luthardt, Sattler, Tiepolt, Barthel); Department of Psychiatry and Psychotherapy, University of Leipzig, Leipzig, Germany (Graef, Hegerl, Schönknecht); Integrated Research and Treatment Centre (IFB) Adiposity Diseases, University of Leipzig, Leipzig, Germany (Hesse); Max-Planck-Institute for Human Cognitive and Brain Sciences, Leipzig (Graef); Central Institute for Engineering, Electronics and Analytics—Electronic Systems (ZEA-2), Forschungszentrum Jülich, Jülich, Germany (Wagenknecht); ABX Advanced Biochemical Compounds GmbH, Radeberg, Germany (Hoepping, Smits); Centre for Clinical Trials Leipzig, University of Leipzig, Leipzig, Germany (Franke); Department of Neuroradiopharmaceuticals, Institute of Radiopharmaceutical Cancer Research, Helmholtz-Zentrum Dresden-Rossendorf, Research Site Leipzig, Leipzig, Germany (Fischer, Deuther-Conrad, Brust)

**Corresponding Author:** Osama Sabri, MD, PhD; Department of Nuclear Medicine, University of Leipzig; Liebigstraße 18, 04103 Leipzig, Germany (email: [Osama.Sabri@medizin.uni-leipzig.de](mailto:Osama.Sabri@medizin.uni-leipzig.de); phone: ++49-341-9718000; fax: ++49-341-9718129)

## Supplementary material

### Supplementary results

#### **$\alpha 4\beta 2$ -nAChR availability in Alzheimer's dementia compared with healthy controls**

##### **VOI analysis of GMD-mask-weighted $V_T$ data ( $V_T$ [GMDW])**

VOI analysis identified that in Alzheimer's dementia, compared with healthy controls, similar to  $V_T$ - and  $V_S$ -VOI analyses, there was lower  $V_T$ [GMDW] in cortical and subcortical brain regions reaching significance within four of the five a-priori selected brain regions, such as the hippocampus as part of the mesial temporal cortex (-7%;  $P=0.002$ ;  $P<0.05_{\text{corrected}}$ ), basal forebrain (-8%;  $P=0.008$ ;  $P<0.05_{\text{corrected}}$ ), frontal cortex (-4%;  $P=0.019$ ;  $P<0.05_{\text{uncorrected}}$ ) and mean cortex (-4%;  $P=0.021$ ;  $P<0.05_{\text{uncorrected}}$ ), remaining significant following correction for multiple testing within the hippocampus and basal forebrain.

For post-hoc selected brain regions, in Alzheimer's dementia, there was significantly lower  $V_T$ [GMDW] within the thalamus (-9%;  $P=0.002$ ;  $P<0.05_{\text{corrected}}$ ), remaining significant following correction for multiple comparisons. In Alzheimer's dementia, lower  $V_T$ [GMDW] was present within the lateral temporal cortex (-3%;  $P=0.047$ ;  $P<0.05_{\text{uncorrected}}$ ), anterior cingulate cortex (-2%;  $P=0.023$ ;  $P<0.05_{\text{uncorrected}}$ ), and cerebellar cortex (-6%;  $P=0.031$ ;  $P<0.05_{\text{uncorrected}}$ ), although those differences did not remain significant following correction for multiple comparisons (*Supplementary Table 4*).

**VOI analysis of PVE-corrected  $V_T$  data ( $V_T$ [PVEC])**

Following partial volume effect (PVE) correction, there was significantly lower  $V_T$ [PVEC] in patients with Alzheimer's dementia as compared to healthy controls, similar to analyses of  $V_T$ ,  $V_S$ , and  $V_T$ [GMDW] in four of the five a-priori selected brain regions.  $V_T$ [PVEC] was lower within the hippocampus as part of the mesial temporal cortex (-11%;  $P=0.003$ ;  $P<0.05_{corrected}$ ), basal forebrain (-13%;  $P=0.009$ ;  $P<0.05_{corrected}$ ), mean cortex (-4%;  $P=0.031$ ;  $P<0.05_{uncorrected}$ ), frontal cortex (-4%;  $P=0.034$ ;  $P<0.05_{uncorrected}$ ), remaining significant following correction for multiple testing within the hippocampus and basal forebrain.

Furthermore, for post-hoc selected brain regions, in Alzheimer's dementia, there was significantly lower  $V_T$ [PVEC] within anterior cingulate cortex (-4%;  $P=0.013$ ;  $P<0.05_{uncorrected}$ ), pons (-7%;  $P=0.042$ ;  $P<0.05_{uncorrected}$ ), and cerebellar cortex (-6%;  $P=0.026$ ;  $P<0.05_{uncorrected}$ ), though those differences did not remain significant after correction for multiple comparisons (*Supplementary Table 5*).

Given the smaller variance (*Table 2 and Supplementary Table 5*) and that similar findings were produced using  $V_T$ [PVEC] and  $V_T$  data, the primary outcome measure used for all PET analyses was the  $V_T$  data (Villemagne *et al.*, 2013).

## **Relationship between $\alpha 4\beta 2$ -nAChR availability in a-priori defined brain regions and cognition in Alzheimer's dementia as assessed by VOI analysis**

### **$V_S$**

In Alzheimer's dementia, a significant positive correlation between episodic memory and  $V_S$  within a-priori defined brain regions was restricted to the frontal cortex ( $r=0.57$ ;  $P=0.044$ ;  $P<0.05_{\text{uncorrected}}$ ). Further, a positive significant correlation between executive function/working memory and  $V_T$  within the parietal cortex was found ( $r=0.62$ ;  $P=0.021$ ;  $P<0.05_{\text{uncorrected}}$ ). There were no significant correlations between attention, visuospatial function or language and  $V_S$  within any of the a-priori selected cortical regions.

Thus, compared with the correlation results of the  $V_T$  data, correlations between  $V_S$  and cognitive function were less significant and not significant following correction for multiple comparisons. A possible explanation for this is that the corpus callosum, which is used to calculate the  $V_S$ , has a small volume with the disadvantage of a higher noise part.

### **$V_T$ [GMDW]**

In Alzheimer's dementia, there were significant positive associations between episodic memory and  $V_T$ [GMDW] within a-priori defined brain regions such as the frontal ( $r=0.71$ ;  $P=0.011$ ;  $P<0.05_{\text{corrected}}$ ), mesial temporal ( $r=0.62$ ;  $P=0.027$ ;  $P<0.05_{\text{uncorrected}}$ ) and parietal cortices ( $r=0.64$ ;  $P=0.024$ ;  $P<0.05_{\text{uncorrected}}$ ). These findings remained significant following correction for multiple testing within the frontal cortex. There was no significant relationship between memory and  $V_T$ [GMDW] within the basal forebrain ( $r=0.35$ ;  $P=0.164$ ). Executive function/working memory and  $V_T$ [GMDW] showed a significant positive correlation within the parietal cortex ( $r=0.79$ ;  $P=0.003$ ;  $P<0.05_{\text{corrected}}$ ), although a significant correlation was not found within the frontal cortex ( $r=0.52$ ;  $P=0.063$ ). There were no significant correlations between attention, visuospatial function or language and  $V_T$ [GMDW] within any of the a-priori selected cortical regions. Thus, findings of the correlation analyses between  $V_T$ [GMDW] and cognitive partial functions in Alzheimer's dementia show similarities to findings obtained by correlation analyses of  $V_T$ , although following correction for multiple comparisons, correlations remain only significant between episodic memory and  $V_T$ [GMDW] within the frontal cortex and executive function / working memory and  $V_T$ [GMDW] within the parietal cortex.

## **V<sub>T</sub>[PVEC]**

The findings of correlation analyses between V<sub>T</sub>[PVEC] and cognitive partial functions in Alzheimer's dementia were similar to the findings obtained by correlation analysis of V<sub>T</sub>:

In Alzheimer's dementia, there were significant positive associations between episodic memory and V<sub>T</sub>[PVEC] within a-priori defined brain regions such as the frontal ( $r=0.79$ ;  $P=0.003$ ;  $P<0.05_{\text{corrected}}$ ), mesial temporal ( $r=0.67$ ;  $P=0.017$ ;  $P<0.05_{\text{uncorrected}}$ ) and parietal cortices ( $r=0.65$ ;  $P=0.021$ ;  $P<0.05_{\text{uncorrected}}$ ), remaining significant following correction for multiple testing within the frontal cortex. There was no significant relationship between memory and V<sub>T</sub>[PVEC] within the basal forebrain ( $r=0.20$ ;  $P=0.286$ ).

Executive function/working memory and V<sub>T</sub>[PVEC] demonstrated a significant positive correlation within the frontal cortex ( $r=0.59$ ;  $P=0.037$ ;  $P<0.05_{\text{uncorrected}}$ ) and parietal cortex ( $r=0.83$ ;  $P=0.002$ ;  $P<0.05_{\text{corrected}}$ ). There were no significant correlations between attention, visuospatial function or language and V<sub>T</sub>[PVEC] within any of the a-priori selected cortical regions. Thus, findings of the correlation analyses between V<sub>T</sub>[PVEC] and cognitive partial functions in Alzheimer's dementia show similarities to findings obtained by correlation analyses of V<sub>T</sub>, however, after correction for multiple comparisons, correlations remain only significant between episodic memory and V<sub>T</sub>[PVEC] within the frontal cortex and executive function / working memory and V<sub>T</sub>[PVEC] within the parietal cortex.

## **Relationship between $\alpha 4\beta 2$ -nAChR availability within subregions of the mesial temporal cortex and episodic memory in Alzheimer's dementia as assessed by post hoc explorative VOI-analysis**

### **V<sub>T</sub>**

Between episodic memory and V<sub>T</sub> there was a trend for a positive correlation within the hippocampus ( $r=0.52$ ;  $P=0.06$ ) and a significant, positive correlation within the amygdala ( $r=0.67$ ;  $P=0.018$ ).

### **V<sub>S</sub>**

Between episodic memory and V<sub>S</sub> there was no significant correlation within the hippocampus ( $r=0.31$ ;  $P=0.188$ ) and a significant, positive correlation within the amygdala ( $r=0.80$ ;  $P=0.003$ ).

### **V<sub>T</sub>[GMDW]**

Between episodic memory and V<sub>T</sub>[GMDW] there was a trend for a positive correlation within the hippocampus ( $r=0.50$ ;  $P=0.07$ ) and a significant, positive correlation within the amygdala ( $r=0.58$ ;  $P=0.038$ ).

### **V<sub>T</sub>[PVEC]**

Between episodic memory and V<sub>T</sub>[PVEC] there was a trend for a positive correlation within the hippocampus ( $r=0.46$ ;  $P=0.09$ ) and a significant, positive correlation within the amygdala ( $r=0.65$ ;  $P=0.022$ ).

To summarize, post-hoc VOI-based correlation analysis between episodic memory and PET data within subregions of the mesial temporal cortex showed a trend for a positive correlation within the hippocampus (V<sub>T</sub>, V<sub>T</sub>[GMDW], V<sub>T</sub>[PVEC]), and a significant, positive correlation within the amygdala for all aforementioned PET parameters. This relationship between episodic memory and  $\alpha 4\beta 2$ -nAChR availability within the amygdala is interesting, however not so surprising as 1) there is a close bidirectional interaction between the amygdala and hippocampus, 2) episodic memory has been linked to the frontal cortex, hippocampus and amygdala, as shown by functional MRI studies, and 3) as previously shown, direct electrical stimulation of the amygdala increases declarative memory in humans without emotional contribution (Yancey and Phelps 2001; Phelps 2004; Inman *et al.*, 2018). Further prospective

$\alpha 4\beta 2$ -nAChR PET investigations of subregions of the mesial temporal cortex in Alzheimer's dementia are needed for verification of these findings.

### **Supplementary references**

Inman CS, Manns JR, Bijanki KR, Bass DI, Hamann S, Drane DL, et al. Direct electrical stimulation of the amygdala enhances declarative memory in humans. *Proc Natl Acad Sci U S A* 2018; 115: 98-103.

Phelps EA. Human emotion and memory: interactions of the amygdala and hippocampal complex. [Review]. *Curr Opin Neurobiol* 2004;14: 198-202.

Villemagne VL, Burnham S, Bourgeat P, Brown B, Ellis KA, Salvado O, et al. Australian Imaging Biomarkers and Lifestyle (AIBL) Research Group. Amyloid  $\beta$  deposition, neurodegeneration, and cognitive decline in sporadic Alzheimer's disease: a prospective cohort study. *Lancet Neurol* 2013; 12: 357-67.

Yancey SW, Phelps EA. Functional neuroimaging and episodic memory: a perspective. *J Clin Exp Neuropsychol* 2001; 23: 32-48.

## Supplementary Figure

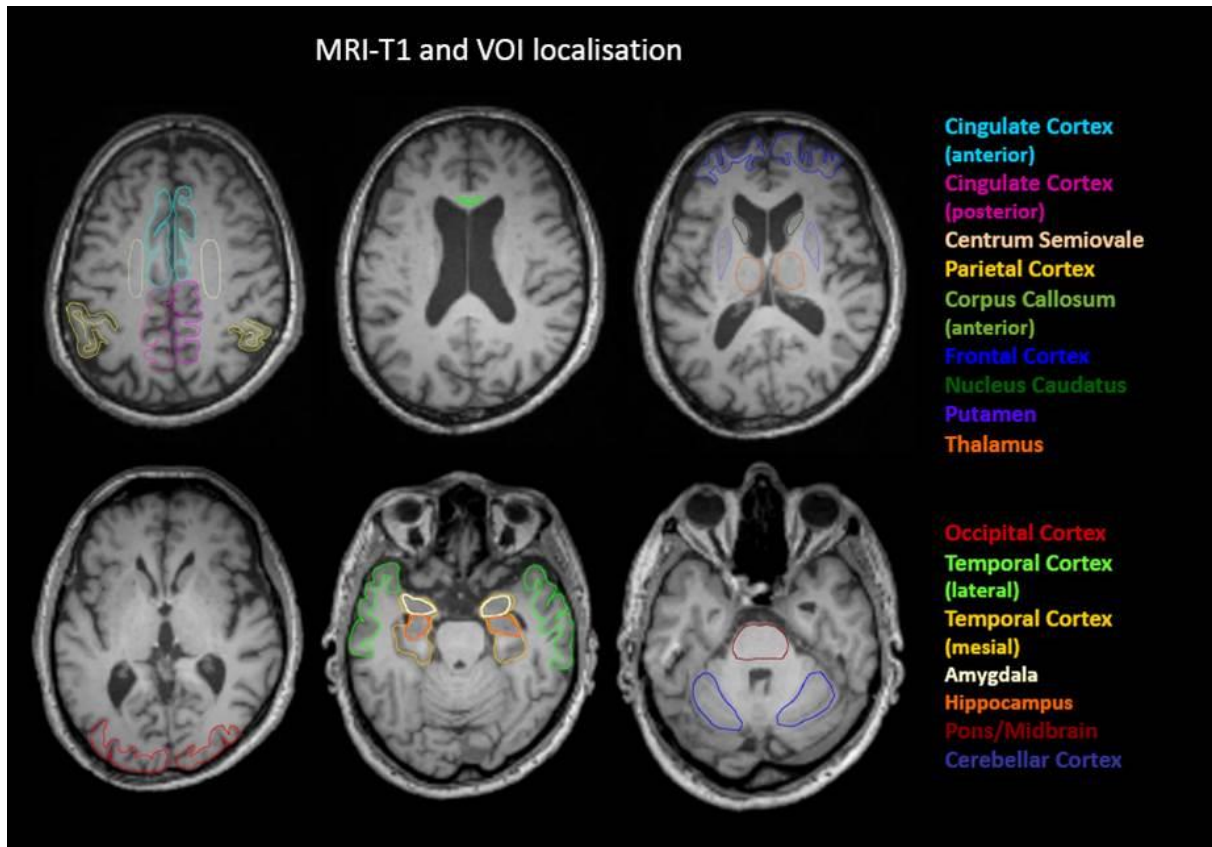

**Supplementary Figure.** Localizations of individually drawn regions of interest for VOI analysis.

The localizations of individually drawn regions of interest for VOI analysis within the MRI of one study subject are shown.



## Supplementary Tables

**Supplementary Table 1.** Clinical characteristics and MRI measures in Alzheimer's dementia and healthy controls: comparison of means (SD).

|                                | <b>Alzheimer's<br/>dementia<br/>(n = 14)</b> | <b>Healthy<br/>controls<br/>(n = 15)</b> | <b>P-value</b>   |
|--------------------------------|----------------------------------------------|------------------------------------------|------------------|
| Age                            | 75.1 (6.2)                                   | 71.3 (4.7)                               | 0.071            |
| Education                      | 13.1 (2.2)                                   | 13.8 (1.5)                               | 0.378            |
| Sex (Female/Male) <sup>a</sup> | 10 / 4                                       | 7 / 8                                    | 0.264            |
| MMSE                           | 24.0 (2.6)                                   | 28.4 (0.9)                               | <b>&lt;0.001</b> |
| GDS                            | 7.4 (3.6)                                    | 3.3 (2.2)                                | <b>&lt;0.001</b> |
| Scheltens-Score                | 1.4 (1.0)                                    | 0.7 (0.5)                                | <b>0.025</b>     |
| Fazekas-PVH                    | 1.3 (0.8)                                    | 0.8 (0.7)                                | 0.074            |
| Fazekas-DWMH                   | 1.3 (0.7)                                    | 0.8 (0.6)                                | 0.053            |

Abbreviations: DWMH = deep white matter hyperintensities; GDS = Geriatric Depression Scale; MMSE = Mini-Mental-State-Examination; PVH = periventricular white matter hyperintensities; SD = standard deviation.

Unpaired two-tailed t-test for the comparison between Alzheimer's dementia and healthy controls; significance at  $P < 0.05$  (bold).

<sup>a</sup>Fisher's exact test; significance at  $P < 0.05$  uncorrected.

**Supplementary Table 2.** Cognitive test results in Alzheimer's dementia patients and healthy controls

|                                          | <sup>a</sup> Z-scores |                  | t/F   | df/N | P value          |
|------------------------------------------|-----------------------|------------------|-------|------|------------------|
|                                          | Alzheimer's dementia  | Healthy controls |       |      |                  |
| <sup>b</sup> Attention                   |                       |                  |       |      |                  |
| AKT-G                                    | 0.54 (1.10)           | 1.47 (0.99)      | -2.30 | 25   | <b>0.030</b>     |
| Digit span forward                       | -0.68 (0.74)          | -0.01 (0.70)     | -1.92 | 18   | 0.071            |
| <b>Executive function/working memory</b> |                       |                  |       |      |                  |
| TMT-A                                    | -1.13 (1.35)          | 0.18 (1.17)      | -2.76 | 26   | <b>0.010</b>     |
| TMT-B                                    | -0.66 (1.08)          | 0.55 (1.00)      | -2.58 | 20   | <b>0.018</b>     |
| TMT-B/A                                  | -0.20 (1.08)          | 0.41 (0.90)      | -1.39 | 20   | 0.180            |
| Digit span backward                      | -0.51 (0.77)          | 0.24 (1.08)      | -1.53 | 18   | 0.143            |
| Letter fluency                           | -1.49 (1.14)          | 0.73 (0.66)      | -6.47 | 27   | <b>&lt;0.001</b> |
| <b>Language</b>                          |                       |                  |       |      |                  |
| Category fluency                         | -0.52 (0.98)          | 0.66 (1.14)      | -2.98 | 27   | <b>0.006</b>     |
| BNT                                      | -0.69 (1.30)          | 0.45 (0.74)      | -2.93 | 27   | <b>0.007</b>     |
| <b>Visuospatial abilities</b>            |                       |                  |       |      |                  |
| CERAD visuoconstruction copy             | -1.93 (1.54)          | -0.61 (0.95)     | -2.80 | 27   | <b>0.009</b>     |
| CERAD visuoconstruction recall           | -2.17 (0.95)          | 0.22 (0.98)      | -6.63 | 27   | <b>&lt;0.001</b> |
| <b>Episodic memory</b>                   |                       |                  |       |      |                  |
| CERAD wordlist immediate recall          | -2.88 (1.47)          | 0.45 (0.72)      | -7.83 | 27   | <b>&lt;0.001</b> |
| CERAD wordlist delayed recall            | -2.14 (0.76)          | 0.39 (1.11)      | -7.10 | 27   | <b>&lt;0.001</b> |
| CERAD wordlist savings score             | -1.14 (1.72)          | 0.15 (1.20)      | -2.31 | 26   | <b>0.029</b>     |
| CERAD visuoconstruction savings score    | -1.44 (1.14)          | 0.43 (0.87)      | -4.95 | 27   | <b>&lt;0.001</b> |
| WMS Logical Memory I                     | -2.56 (1.55)          | 0.31 (1.19)      | -4.53 | 18   | <b>&lt;0.001</b> |
| WMS Logical Memory II                    | -3.19 (0.86)          | 0.43 (0.94)      | -8.03 | 18   | <b>&lt;0.001</b> |

Abbreviations: AK-T = Alters-Konzentrations-Test; BNT = Boston Naming Test; CERAD = The Consortium to Establish a Registry for Alzheimer's dementia; TMT = Trail Making Test; WMS = Wechsler Memory Scale.

<sup>a</sup>Z-scores are given as mean and standard deviation (in brackets).

<sup>b</sup>ANCOVA was carried out for variable to account for years of education as covariate.

Unpaired two-tailed t-test for the comparison between Alzheimer's dementia and healthy controls; significance at  $P < 0.05$  (bold).

**Supplementary Table 3.** VOI analysis of  $V_S$  (specific binding part of the distribution volume) with the corpus callosum as pseudo-reference region within the brain of Alzheimer's dementia and healthy controls.

| $V_S$                          | Alzheimer's dementia (n=14) |      | Healthy controls (n=15) |      | Change of AD compared with HC (%) | <i>t/F</i> | <i>P value</i> |
|--------------------------------|-----------------------------|------|-------------------------|------|-----------------------------------|------------|----------------|
|                                | Mean                        | SD   | Mean                    | SD   |                                   |            |                |
| <sup>a</sup> Mean cortex       | 2.88                        | 0.76 | 3.34                    | 0.60 | -14                               | 4.79       | <b>0.009</b>   |
| <sup>a</sup> Frontal cortex    | 2.96                        | 0.89 | 3.42                    | 0.65 | -13                               | 4.14       | <b>0.016</b>   |
| Lateral temporal cortex        | 2.80                        | 0.81 | 3.10                    | 0.60 | -10                               | 3.33       | 0.036          |
| Mesial temporal cortex         | 2.78                        | 0.80 | 3.52                    | 0.63 | -21                               | 6.04       | 0.003          |
| <sup>a</sup> Hippocampus       | 3.13                        | 0.97 | 4.09                    | 0.78 | -23                               | 6.82       | <b>0.002</b>   |
| Amygdala                       | 3.32                        | 0.68 | 3.76                    | 0.82 | -12                               | 1.97       | 0.144          |
| <sup>a</sup> Parietal cortex   | 2.97                        | 0.80 | 3.30                    | 0.71 | -10                               | 2.87       | 0.057          |
| Occipital cortex               | 2.24                        | 0.80 | 2.18                    | 0.63 | 3                                 | 2.91       | 0.054          |
| <sup>a</sup> Basal forebrain   | 1.48                        | 1.22 | 2.24                    | 0.82 | -34                               | 4.00       | <b>0.019</b>   |
| Anterior cingulate cortex      | 3.10                        | 0.67 | 3.39                    | 0.64 | -8                                | 3.25       | 0.039          |
| Posterior cingulate cortex     | 3.25                        | 0.49 | 3.43                    | 0.64 | -5                                | 1.46       | 0.249          |
| Caudate nucleus                | 4.14                        | 1.25 | 4.38                    | 0.88 | -5                                | 0.26       | 0.852          |
| Putamen                        | 5.70                        | 1.27 | 5.55                    | 0.78 | 3                                 | 0.40       | 0.752          |
| Thalamus                       | 17.29                       | 3.11 | 19.61                   | 2.98 | -12                               | 3.88       | 0.021          |
| Pons/Midbrain                  | 4.54                        | 1.03 | 5.28                    | 1.10 | -14                               | 2.14       | 0.120          |
| Cerebellar cortex              | 6.09                        | 1.17 | 6.86                    | 0.88 | -11                               | 1.99       | 0.141          |
| White matter-centrum semiovale | 4.20                        | 1.32 | 4.26                    | 0.84 | -2                                | 3.49       | 0.030          |

Abbreviations: AD = Alzheimer's dementia; FDR = False discovery rate; HC = healthy controls;  $V_S$  = specific binding part of the distribution volume; VOI = volume of interest.

<sup>a</sup>a-priori selected brain region with known Alzheimer's dementia pathology.

ANCOVA for the comparison of  $V_S$  between Alzheimer's dementia and healthy controls (adjusted for age and sex), within five a-priori defined cortical brain regions, such as mean cortex, frontal, mesial temporal [hippocampus], parietal cortices, and basal forebrain (in bold); significance at  $P < 0.05_{\text{corrected}}$  (false discovery rate correction according to Benjamini-Hochberg; in bold). Furthermore exploratory post-hoc analysis for eleven additional brain regions, significance at  $P < 0.005_{\text{uncorrected}}$  ( $P < 0.05_{\text{corrected}}$ ; FDR-correction).

**Supplementary Table 4.** Individual VOI analysis of the GMD-mask weighted  $V_T$  values ( $V_{T[GMDW]}$ ) in Alzheimer's dementia and healthy controls.

| $V_{T[GMDW]}$                | Alzheimer's dementia (n=14) |      | Healthy controls (n=15) |      | Change of AD compared with HC (%) | <i>t/F</i> | <i>P-value</i> |
|------------------------------|-----------------------------|------|-------------------------|------|-----------------------------------|------------|----------------|
|                              | Mean                        | SD   | Mean                    | SD   |                                   |            |                |
| <sup>a</sup> Mean cortex     | 8.07                        | 1.00 | 8.41                    | 0.46 | -4                                | 3.87       | 0.021          |
| <sup>a</sup> Frontal cortex  | 8.11                        | 1.05 | 8.49                    | 0.54 | -4                                | 3.98       | 0.019          |
| Lateral temporal cortex      | 8.03                        | 0.96 | 8.24                    | 0.38 | -3                                | 3.05       | 0.047          |
| Mesial temporal cortex       | 8.03                        | 1.10 | 8.62                    | 0.54 | -7                                | 4.61       | 0.011          |
| <sup>a</sup> Hippocampus     | 8.46                        | 1.22 | 9.08                    | 0.57 | -7                                | 6.29       | <b>0.002</b>   |
| Amygdala                     | 8.53                        | 1.19 | 8.74                    | 0.69 | -2                                | 0.92       | 0.444          |
| <sup>a</sup> Parietal cortex | 8.10                        | 1.09 | 8.27                    | 0.57 | -2                                | 2.15       | 0.119          |
| Occipital cortex             | 7.51                        | 0.85 | 7.46                    | 0.34 | 1                                 | 0.99       | 0.414          |
| <sup>a</sup> Basal forebrain | 6.95                        | 1.29 | 7.52                    | 0.98 | -8                                | 4.97       | <b>0.008</b>   |
| Anterior cingulate cortex    | 8.35                        | 1.01 | 8.51                    | 0.69 | -2                                | 3.78       | 0.023          |
| Posterior cingulate cortex   | 8.41                        | 0.97 | 8.53                    | 0.54 | -1                                | 1.05       | 0.388          |
| Caudate nucleus              | 8.85                        | 1.30 | 9.32                    | 0.81 | -5                                | 1.13       | 0.356          |
| Putamen                      | 10.49                       | 1.21 | 10.55                   | 0.92 | -1                                | 1.39       | 0.270          |
| Thalamus                     | 20.77                       | 3.74 | 22.90                   | 2.86 | -9                                | 6.65       | <b>0.002</b>   |
| Pons/Midbrain                | 7.86                        | 1.13 | 8.44                    | 1.31 | -7                                | 1.45       | 0.253          |
| Cerebellar cortex            | 10.91                       | 1.49 | 11.56                   | 0.85 | -6                                | 3.46       | 0.031          |

Abbreviations: AD = Alzheimer's dementia; FDR = False discovery rate; GMD = grey matter density; HC = healthy controls;  $V_{T[GMDW]}$  = grey matter density mask weighted distribution volume; VOI = volume of interest.

<sup>a</sup>a-priori selected brain region with known Alzheimer's dementia pathology.

ANCOVA for the comparison of  $V_{T[GMDW]}$  between Alzheimer's dementia and healthy controls (adjusted for age and sex), within five a-priori defined cortical brain regions, such as mean cortex, frontal, mesial temporal [hippocampus], parietal cortices, and basal forebrain (in bold); significance at  $P < 0.05_{\text{corrected}}$  (false discovery rate

correction according to Benjamini-Hochberg; in bold). Further, exploratory post-hoc analysis for ten additional brain regions, significance at  $P < 0.005_{\text{uncorrected}}$  ( $P < 0.05_{\text{corrected}}$ ; FDR-correction).

**Supplementary Table 5.** Individual VOI analysis of the PVE-corrected  $V_T$  values ( $V_{T[PVEC]}$ ) in Alzheimer's dementia and healthy controls.

| $V_{T[PVEC]}$                  | Alzheimer's dementia (n=14) |      | Healthy controls (n=15) |      | Change of AD compared with HC (%) | <i>t/F</i> | <i>P-value</i> |
|--------------------------------|-----------------------------|------|-------------------------|------|-----------------------------------|------------|----------------|
|                                | Mean                        | SD   | Mean                    | SD   |                                   |            |                |
| <sup>a</sup> Mean cortex       | 9.65                        | 1.16 | 10.04                   | 0.59 | -4                                | 3.49       | 0.031          |
| <sup>a</sup> Frontal cortex    | 9.77                        | 1.40 | 10.23                   | 0.72 | -4                                | 3.38       | 0.034          |
| Lateral temporal cortex        | 9.77                        | 1.12 | 9.96                    | 0.57 | -2                                | 2.38       | 0.094          |
| Mesial temporal cortex         | 9.34                        | 1.22 | 10.11                   | 0.68 | -8                                | 4.17       | 0.016          |
| <sup>a</sup> Hippocampus       | 9.33                        | 1.43 | 10.53                   | 1.01 | -11                               | 6.06       | <b>0.003</b>   |
| Amygdala                       | 10.00                       | 1.42 | 10.33                   | 1.24 | -3                                | 0.25       | 0.864          |
| <sup>a</sup> Parietal cortex   | 9.82                        | 1.28 | 10.11                   | 0.76 | -3                                | 1.62       | 0.209          |
| Occipital cortex               | 9.03                        | 0.97 | 8.77                    | 0.56 | 3                                 | 1.08       | 0.375          |
| <sup>a</sup> Basal forebrain   | 7.77                        | 2.73 | 8.92                    | 2.01 | -13                               | 4.79       | <b>0.009</b>   |
| Anterior cingulate cortex      | 10.56                       | 1.10 | 11.01                   | 1.10 | -4                                | 4.36       | 0.013          |
| Posterior cingulate cortex     | 10.37                       | 1.13 | 10.61                   | 0.86 | -2                                | 0.88       | 0.467          |
| Caudate nucleus                | 13.76                       | 2.40 | 13.65                   | 1.60 | 1                                 | 0.50       | 0.685          |
| Putamen                        | 12.17                       | 1.84 | 11.90                   | 1.33 | 2                                 | 0.42       | 0.743          |
| Thalamus                       | 28.71                       | 4.30 | 30.94                   | 4.49 | -7                                | 2.61       | 0.074          |
| Pons/Midbrain                  | 11.53                       | 1.47 | 12.37                   | 1.10 | -7                                | 3.16       | 0.042          |
| Cerebellar cortex              | 13.24                       | 1.78 | 14.04                   | 1.11 | -6                                | 3.67       | 0.026          |
| White matter centrum semiovale | 13.70                       | 3.86 | 13.14                   | 2.49 | 4                                 | 0.37       | 0.773          |

Abbreviations: AD = Alzheimer's dementia; FDR = False discovery rate; HC = healthy controls; PVEC = partial volume effect correction;  $V_{T[PVEC]}$  = partial volume effect-corrected distribution volume; VOI = volume of interest.

<sup>a</sup>a-priori selected brain region with known Alzheimer's dementia pathology.

ANCOVA for the comparison of  $V_{T[PVECT]}$  between Alzheimer's dementia and healthy controls (adjusted for age and sex) within five a-priori defined cortical brain regions, such as mean cortex, frontal, mesial temporal [hippocampus], parietal cortices, and basal forebrain (in bold); significance at  $P < 0.05_{\text{corrected}}$  (false discovery rate correction according to Benjamini-Hochberg; in bold). Further, exploratory post-hoc analysis for eleven additional brain regions, significance at  $P < 0.005_{\text{uncorrected}}$  ( $P < 0.05_{\text{corrected}}$ ; FDR-correction).
